## Computational complexity is an ultimate constraint on evolution

Artem Kaznatcheev<sup>1,2</sup>

<sup>1</sup>Department of Computer Science, University of Oxford, Oxford, UK

<sup>2</sup>Department of Translational Hematology & Oncology Research, Cleveland Clinic, Cleveland, OH, USA

Experiments show that evolutionary fitness landscapes can have a rich combinatorial structure due to epistasis. For some landscapes, this structure can produce a computational constraint that prevents evolution from finding local fitness optima – thus overturning the traditional assumption that local fitness peaks can always be reached quickly if no other evolutionary forces challenge natural selection. Here, I introduce a distinction between easy landscapes of traditional theory where local fitness peaks can be found in a moderate number of steps and hard landscapes where finding local optima requires an infeasible amount of time. Hard examples exist even among landscapes with no reciprocal sign epistasis; on these semi-smooth fitness landscapes, strong selection weak mutation dynamics cannot find the unique peak in polynomial time. More generally, on hard rugged fitness landscapes that include reciprocal sign epistasis, no evolutionary dynamics – even ones that do not follow adaptive paths – can find a local fitness optimum quickly. Moreover, on hard landscapes, the fitness advantage of nearby mutants cannot drop off exponentially fast but has to follow a power-law that long term evolution experiments have associated with unbounded growth in fitness. Unlike prior examples of evolutionary constraints, this constraint arises solely from natural selection and cannot be overpowered by other evolutionary forces. Knowing this constraint allows us to use the tools of theoretical computer science and combinatorial optimization to characterize the fitness landscapes that we expect to see in nature. I present candidates for hard landscapes at scales from single genes, to microbes, to complex organisms with costly learning (Baldwin effect) or maintained cooperation (Hankshaw effect).

Fitness landscapes combine numeric fitnesses and a mutation-graph into a combinatorially structured space where each vertex is a possible genotype (or phenotype). The numeric structure is given by a function that maps each genotype to a fitness; typically represented as a non-negative real number and having different physical operationalizations in different experimental systems. The mutation-graph specifies which genotypes are similar, typically as edges between any two genotypes that differ in a single mutation. This provides the combinatorial structure.

We usually imagine fitness landscapes as hills or mountain ranges, and continue to assume – as Wright [1] originally did – that on an arbitrary landscape “selection will easily carry the species to the nearest peak”. For those that view evolution as a sum of forces, with natural selection being only one of them, it is possible for other forces to overpower natural selection and keep the population away from a local fitness peak. Such cases of maladaptation [2] are usually attributed to mechanisms like mutation meltdown, mutation bias, recombination, genetic constraints due to lack of variation, or explicit physical or developmental constraints of a particular physiology. I will refer to such situations, where non-selection forces (and/or aspects internal to the population) keep the population from reaching a local fitness peak, as *proximal* constraints on evolution. In contrast, a constraint is *ultimate* if it is due exclusively to features of the fitness landscape and is present in the absence of other forces or even holds regardless of the strength of other forces. I introduce this distinc-

tion between proximal and ultimate constraints by analogy to Mayr’s distinction between proximal and ultimate causes in biology [3]. Mayr considered as ultimate only those evolutionary causes that are due exclusively to the historic process of natural selection [4], so I consider as ultimate only those evolutionary constraints that are due exclusively to the structure of natural selection.

One candidate for an ultimate constraint on evolution – historicity or path-dependence – is already widely recognized. A local peak might not be the tallest in the mountain range, so reaching it can prevent us from walking uphill to the tallest peak. This constraint has directed much of the work on fitness landscapes toward how to avoid sub-optimal peaks or how a population might move from one peak to another [1, 5]. Usually, these two questions are answered with appeals to the strength of other evolutionary forces. But both of these types of questions implicitly assume that local peaks are the norm for natural selection and easy to reach. We seldom consider that even reaching a local peak might be impossible in any reasonable amount of time.

Here I show that computational complexity is an ultimate constraint on evolution. A careful analysis – formal mathematical proofs for all statements are available in the supplementary appendix (SA) and referenced throughout the text – shows that the combinatorial structure of fitness landscapes can prevent populations from even reaching local fitness peaks. This suggests an alternative metaphor for fitness landscapes: fitness landscapes as mazes with the local fitness

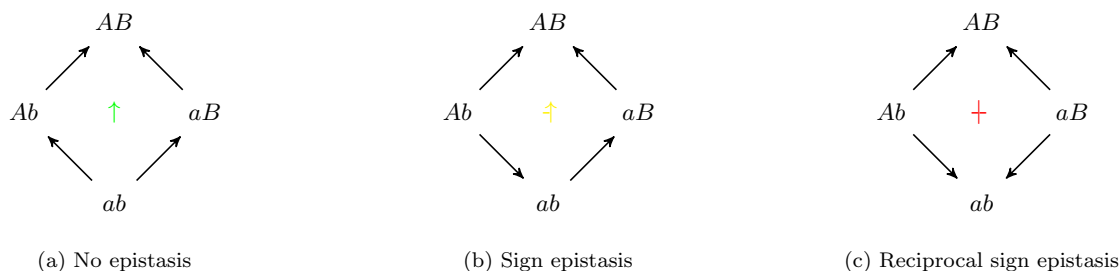

Figure 1: **Three different kinds of epistasis possible in fitness graphs.** Arrows are directed from lower fitness genotypes towards mutationally adjacent higher fitness genotypes. Genes  $a, A$  and  $b, B$  are labeled such that fitness  $w(AB) > w(ab)$ . In the center of each graph is a marker for the type of epistasis, the marker’s various rotations & reflections cover the cases where  $AB$  does not have the highest fitness. For this more exhaustive classification and discussion see SA Figure 4 & SA A.1

optima as exits. Natural selection cannot see far in the maze and must rely only on local information. In hard mazes, we can end up following exponentially long winding paths to the exit because we cannot spot the shortcuts. In such cases, even if natural selection is the only force acting on the population, a fitness optimum cannot be found. Worse yet, the hardest mazes might not have any shortcuts and even the most clever and farsighted navigator will not know how to reach the exit in a feasible amount of time. In other words, even if the other evolutionary forces ‘conspire to help’ natural selection, a local fitness optimum cannot be found.

## Epistasis & semi-smooth landscapes

What makes some fitness landscapes difficult to navigate is that the effects of mutations at different loci interact with each other. Epistasis is a measure of the kind and amount of inter-loci interactions. If the fitness effect of a mutation  $a \rightarrow A$  can have a different sign depending on the genetic background  $b$  or  $B$  of another locus then these two loci are said to have sign epistasis (Figure 1b and SA Definition 4). If both mutations have one sign on their own, but the opposite sign together – either bad + bad = good or good + good = bad – then the landscape has reciprocal sign epistasis ([6, 7]; Figure 1c and SA Definition 5). A classic example of reciprocal sign epistasis is a lock-and-key, changing just one of the lock or the key breaks the mechanism, but changing both can be beneficial. Finally, magnitude epistasis (positive and negative; SA Definition 3) are inter-loci interactions that deviate from additivity, but do not change the sign of fitness effects. This type of epistasis does not change the combinatorial structure of the landscape or the computational difficulty of finding fitness optima. As such, I treat it simply as a lack of sign-epistasis.

A landscape without sign epistasis – like the *Escherichia coli*  $\beta$ -lactamase fitness landscape measured by Chou, Chiu, Delaney, Segre, and Marx [8] in figure 2a – is called *smooth* ([7, 9] and SA B), so let’s call a fitness landscape *semi-smooth* if it has no reciprocal sign epistasis. The fitness graphs ([7] and SA A) of semi-smooth fitness landscapes are equivalent to acyclic unique sink orientations previously defined in a different context by Szabó and Welzl [10] for the analysis of simple algorithms (SA Definition 11 and Proposition 12). Since

reciprocal sign epistasis is a necessary condition for multiple peaks (SA Corollary 10 and Poelwijk, Sorin, Kiviet, and Tans [6]), both smooth and semi-smooth fitness landscapes have a single peak  $x^*$ . Further, there are short adaptive paths in both: from any genotype  $x$  there always exists some adaptive path to  $x^*$  of length equal to the number of loci on which  $x$  and  $x^*$  differ (SA Theorem 13). This means that an omniscient navigator that always picks the ‘right’ adaptive point-mutation can be guaranteed to find a short adaptive path to the peak. But unlike smooth landscapes, in a semi-smooth landscape not every shortest path is adaptive and not every adaptive path is short. And since evolution does not have the foresight of an omniscient navigator, it is important to check which adaptive path myopic evolutionary dynamics will follow.

When selection is strong and mutation is weak (SSWM dynamics; introduced by Gillespie [11]), the population can be represented as a single point on the fitness graph with an evolutionary step corresponding to a selective sweep that moves the population to a neighbouring genotype with higher fitness. A number of rules have been suggested for which fitter neighbour will take over the population [12]; the two most common rules are to select a fitter mutant uniformly at random, or to select the fittest mutant. These rules capture the intuition of evolution proceeding solely by natural selection with other forces absent or negligible. All SSWM rules will quickly find the fitness optimum in a smooth fitness landscape. But there exist semi-smooth fitness landscapes such that when starting from a random initial genotype, an exponential number of evolutionary steps will be required for either the random fitter mutant ([13]; SA Theorem 14) or fittest mutant (SA Theorems 19 and 23) dynamics to find the unique fitness optimum. For a small example on six loci, see Figure 3: the black arrows trace the evolutionary path that a population would follow under fittest mutant SSWM dynamics. Although two step adaptive paths exist to the fitness peak (like  $000000 \rightarrow 000001 \rightarrow 000011$ ), the myopic navigator cannot notice these shortcuts and ends up on a long winding path. In other words, even when there is a single peak and adaptive paths of minimal length to it, SSWM dynamics can take exponential time to find that peak.

These results show that the computational complexity of the combinatorial structure can be enough to stop evolu-

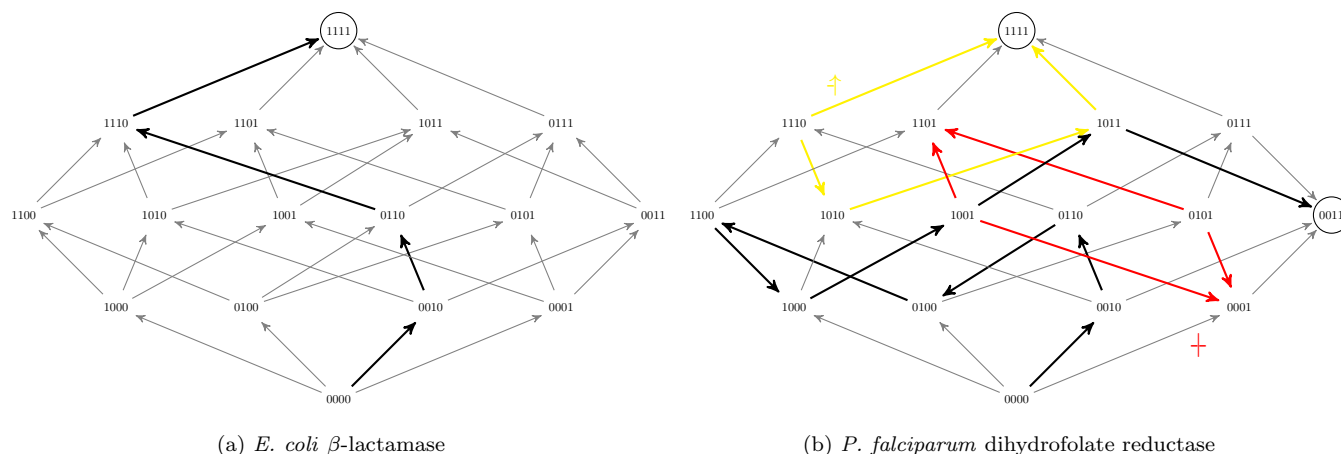

Figure 2: **Two examples of empirical biallelic fitness landscapes on four loci.** Arrows are directed from lower fitness genotypes to higher and fitness optima are circled. Examples of adaptive dynamics are highlighted with thick black arrows. Figure 2a, based on the *E. coli*  $\beta$ -lactamase data of Chou, Chiu, Delaney, Segre, and Marx [8], is a smooth landscape with no sign epistasis. Thus, it contains a single optimum (1111). Figure 2b is based on Lozovsky, Chookajorn, Brown, et al. [14]’a *P. falciparum* dihydrofolate reductase growth rate data in the absence of pyrimethamine. It has two peaks (0011 & 1111) and both single sign (an example in yellow;  $\uparrow$ ) and reciprocal sign epistasis (example in red;  $\oplus$ ). Based on Szendro, Schenk, Franke, Krug, and de Visser [15]’s Figure 1.

tion from reaching a fitness optimum within a reasonable timescale, even in the absence of suboptimal local peaks. Computer scientists have found it helpful to distinguish between processes that require a time that grows polynomially with the size of the input – generally called tractable – and those that require a time that increases faster than any polynomial (super-polynomial) – intractable. If the winding fitness landscapes of Figure 3 is generalized to  $2n$  loci instead of just 6 (SA C.2) then following fittest mutant SSWM dynamics to the peak is an intractable process since it scales exponentially, requiring  $2^{n+1} - 2$  mutational steps. Although evolutionary time is long, it is not reasonable to think of it as exponentially long. For example, the above winding process with a genotype on just 120 loci and with new set of point-mutants and selective sweep at a rate of one every second would require more seconds than the time since the Big Bang.

To capture this infeasibility of super-polynomial scaling in time, I introduce a distinction between *easy* and *hard* families of fitness landscapes. If we can guarantee for any landscape in the family that a local fitness peak can be found by natural selection in a time the scales as a polynomial in the number of loci – as is the case for smooth fitness landscapes – then I will call that an *easy* family of landscapes. I will call a family of landscapes *hard* if we can show that the family contains landscapes where finding a local fitness optimum requires a super-polynomial amount of time – as I showed above for semi-smooth fitness landscapes. Given that even for moderately sized genomes such large times are not realizable even on cosmological timescales, I will use “impossible” as a shorthand for “requiring an infeasible amount of time”.

Given their exponential size, it is impossible to completely measure whole fitness landscapes on more than a few nucleotides. But with improvements in high-throughput second-

generation DNA sequencing there is hope to measure local fitness landscapes of a few mutations away from a wildtype. Puchta, Cseke, Czaja, Tollervey, Sanguinetti, and Kudla [16] estimated the fitness of 981 single-step mutations of a 333-nucleotide small nucleolar RNA (snoRNA) gene in yeast. They found no neighbours fitter than the wild type gene, this suggests that this gene is already at a fitness peak, and hence that the snoRNA gene’s fitness landscape is easy. In contrast, Li, Qian, Maclean, and Zhang [17] estimated the fitness of 207 single-step mutants of a 72-nucleotide transfer RNA (tRNA) gene, also in yeast, finding two neighbours that are significantly fitter than the wildtype and a number that are fitter but only within experimental noise. Thus, the wildtype tRNA gene is apparently not at a local fitness peak, and suggests this system as a candidate for hard fitness landscapes. Both studies also looked at many 2- and 3-step mutants, and the landscape of the tRNA gene was measured to have more than 160 cases of significant sign epistasis [17], with none in the snoRNA landscape [16], mirroring the difference between hard semi-smooth fitness landscapes and easy smooth landscapes that I am prosing here.

## Rugged landscapes & approximate peaks

But there exist natural fitness landscapes that are even more complicated than semi-smooth ones. For example, we know that some landscapes can contain reciprocal sign epistasis like the Lozovsky, Chookajorn, Brown, et al. [14] *Plasmodium falciparum* dihydrofolate reductase fitness landscape in figure 2b. This is a rugged fitness landscape with two distinct fitness peaks at 0011 and 1111. Although there is not enough data to justify postulating probability distributions over large landscapes (for discussion, see SA D.2), the standard biological intuition is that natural landscapes are at least a bit

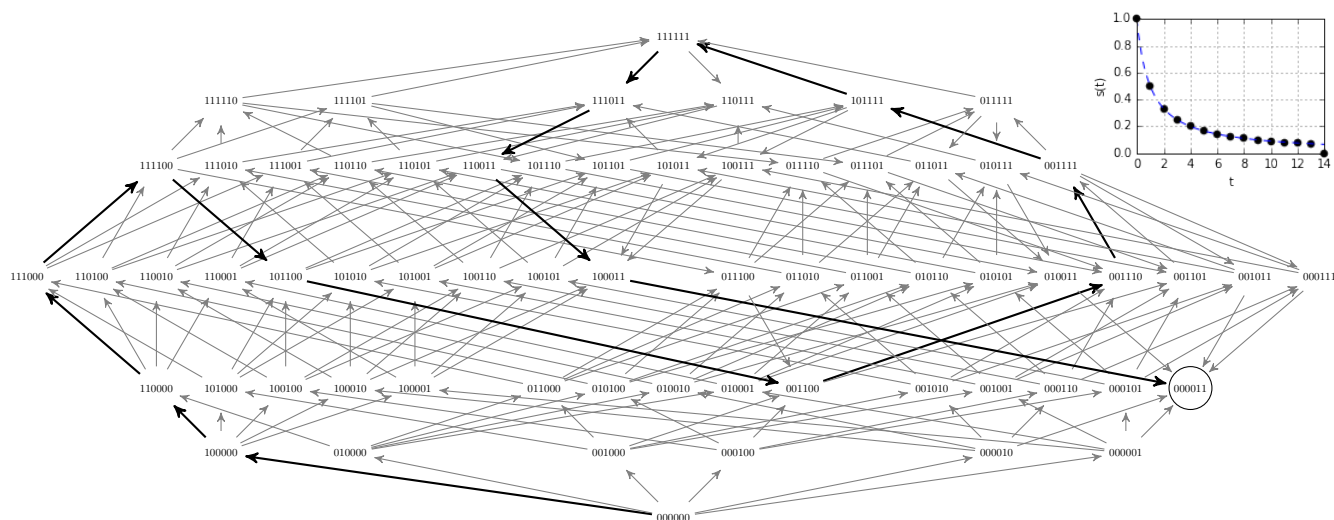

Figure 3: **Fittest mutant adaptive path in a winding semi-smooth fitness landscape.** An example on six loci of the winding semi-smooth fitness landscapes from SA C.2 on which the length of the path followed by fittest-mutant SSWM dynamics scales exponentially with the number of loci. Here the black arrows are the fittest available mutation, and the adaptive path takes 14 steps to reach the fitness peak at 000011. For the generalization of this landscape to  $2n$ -loci, it would take  $2^{n+1} - 2$  steps for fittest mutant dynamics to reach the fitness peak at  $(00)^{n-1}11$  (SA Theorem 19). Inset is the selection coefficient ( $s(t) = \max_{y \in N(x_t) \cup \{x_t\}} \frac{w(y) - w(x)}{w(x)}$ ; SA D.3) versus mutation step number ( $t$ ) for the fittest mutant adaptive path.

rugged and have multiple peaks. The NK-model is a family of fitness landscapes [18, 19] that was introduced to study this ruggedness. This model allows tuning the amount of epistasis: the fitness contribution of each of the  $n$  loci depends not only on its gene, but also on the genes at up to  $K$  other loci (SA Definition 24).

For  $K \geq 2$ , the NK-model can generate hard fitness landscapes where from some initial genotypes, any adaptive walk to a local peak is exponentially long (SA Corollary 27). On such landscapes, any adaptive evolutionary dynamic – including, but not limited to, all the SSWM dynamics we’ve considered so far – generally requires an exponential number of steps to reach a local fitness optimum. Even if an omniscient navigator could always choose the most clever adaptive single mutation to arise, the adaptive path would be unbounded over polynomial timescales.

To better integrate the numeric structure of fitness, let us consider a genotype  $x$  to be at an  $s$ -approximate peak [20] if each of  $x$ ’s mutational neighbours  $y$  have fitness  $w(y) \leq (1 + s)w(x)$  (SA Definition 29). On the hard rough fitness landscapes described above, fittest mutant dynamics will encounter an  $s$ -approximate peak with moderately small  $s$  in a moderate number of mutational steps (polynomial in  $n$  and  $1/s$ ; SA Theorem 31). However, on hard fitness landscapes, it is not possible to find an  $s$ -approximate peak for very small  $s$  in a feasible amount of time (i.e. not possible in time polynomial in  $n$  and  $\ln 1/s$ ; SA Theorem 33).

Given that the quantity  $s$  in the definition of an  $s$ -approximate peak is defined in the same way as the selection

coefficient of population genetics [21], the above approximation results allow us to link the distinction between easy and hard fitness landscapes to the rich empirical literature on fitness traces and declining fitness gains in microbial evolution experiments [22]. On the hard rugged fitness landscapes described above – and even on the winding semi-smooth landscape of Figure 3 and SA C.2 – this selective coefficient drops off at the slow rate of  $s(t) \approx 1/t$  for fittest mutant dynamics. In general, on any family of landscapes – even the hardest ones –  $s(t)$  can decay as fast as a power law. On easy landscapes, it can decay faster. But the power law decay in selection coefficient is the fastest decay possible on hard fitness landscapes. In particular, the selective coefficient, on hard landscapes, cannot decrease at the exponential rate (i.e.  $s(t) \approx e^{-t}$ ; SA Corollary 34) that is typical of equilibration in non-biological systems. This slow decay in selection coefficient is consistent with the rule of declining adaptability observed in various microbial long-term evolution experiments [22–24], suggesting that at least some naturally occurring microbial fitness landscapes might be hard. Thus, a natural candidate for hard landscapes might be the landscapes with unbounded growth in fitness observed in the *E. Coli* long-term evolutionary experiment [23]. Whereas when one sees a power-law in allometry, one expects potential physical constraints; I propose that when one see a power-law in selection strength or fitness, one should look for a computational constraint.

The existence of hard landscapes allows us to explain open-ended evolution as a consequence of the ultimate constraints

of computational complexity. This is in stark contrast to current theoretical accounts of unbounded growth in fitness that rely on models where unbounded growth is directly built-in and the higher-order combinatorial structure of the mutation graph is ignored – usually by treating mutations as iid random samples from a distribution that can always generate a higher fitness variant. Of course, given that I consider large but finite fitness landscapes – to avoid building in the unbounded growth in fitness that I am to explain – it is conceivable that a population will be found at a local fitness peak of a hard fitness landscape. This is conceivable in the same way as – according to the Poincare recurrence theorem – all the oxygen molecules in a large room will eventually return arbitrarily close to the corner they were released from. But just as the Poincare recurrence theorem does not invalidate the second law of thermodynamics [25], the existence of local peaks in finite static landscapes does not invalidate open-ended evolution on hard fitness landscapes.

## Arbitrary evolutionary dynamics: learning & cooperation

As we move from single genes [16, 17], to microbes [22, 23], and on to large organisms, a richer space of possible evolutionary dynamics opens up. To capture this rich space of possibilities, we need to abstract beyond adaptive dynamics by considering arbitrary mutation operators, demographies, population structures and selection functions – even ones that can cross fitness valleys and distribute the population over many genotypes. From the perspective of constraints on evolution: I want to relax the selective constraint that confines populations to an adaptive path [26]. By allowing non-adaptive changes, I want to highlight the power of the constraint of computational complexity, even in the absence of the selective constraint. From the perspective of evolutionary forces: we have to allow for strong forces that can potentially overpower or boost natural selection. To make sure that we have considered all possibilities, I will model arbitrary evolutionary dynamics as all polynomial-time algorithms. This takes us into the realm of the computational complexity class of polynomial local search (PLS; Johnson, Papadimitriou, and Yannakakis [27], Roughgarden [28] and SA D). But even for these most permissive population-updating procedures, evolution will in general require an infeasible amount of time to find a local fitness peak in the NK-model with  $K \geq 2$  (SA Theorem 26 and Corollary 28), or to find an  $s$ -approximate peak for very small  $s$  (SA Theorem 33). Evolution will be trapped in the mazes of hard fitness landscapes and not reach anywhere near the ‘exit’ of a local fitness optimum. No proximal cause can overpower the ultimate constraint of computational complexity.

The strength of this ultimate constraint allows us to reason rigorously from disequilibrium to establish positive results. For instance, that costly learning (Baldwin effect [29, 30]) can remain adaptive, or that hitchhiking can maintain cooperation (Hankshaw effect [31]) effectively forever. In the case of costly learning, Simpson [30] noted: “[c]haracters individually acquired by members of a group of organisms may eventually, under the influence of selection, be reinforced or replaced by

similar hereditary character”. For Simpson [30] this possibility constituted a paradox: if learning does not enhance individual fitness at a local peak and would thus be replaced by simpler non-learning strategies then why do we observe the costly mechanism and associated errors of individual learning? A similar phenomenon is important for the maintenance of cooperation. Hammarlund, Connelly, Dickinson, and Kerr [31] consider a metapopulation that is not sufficiently spatially structured to maintain cooperation. They augment the metapopulation with a number of genes with non-frequency dependent fitness effects that constitute a static fitness landscape. If adaptive mutations are available then cooperators are more likely to discover them due to the higher carrying capacity of cooperative clusters. This allows cooperation to be maintained by hitchhiking on the genes of the static fitness landscape. Hammarlund, Connelly, Dickinson, and Kerr [31] call this hitchhiking the Hankshaw effect and for them it constitutes a transient: since cooperation does not enhance opportunities for adaptive mutations at the fitness peak, then cooperators will be out-competed by defectors.

Currently, both the Baldwin and Hankshaw puzzles are resolved in the same way: just in time environmental change. Most resolutions of the Baldwin paradox focus on non-static fitness in rapidly fluctuating environments that are compatible with the speed of learning but not with evolutionary adaptation. Similarly, Hammarlund, Connelly, Dickinson, and Kerr [31] suggest making their transient permanent by focusing on dynamically changing environments. But, these just-in-time dynamic changes in the fitness landscape are not necessary if we acknowledge the existence of hard static fitness landscapes. Individual costly learning and higher densities of cooperative clusters leading to more mutational opportunities are two very different evolutionary mechanisms for increased adaptability. But they are both just polynomial time algorithms. Regardless of how much these mechanisms speed-up, slow-down, guide, or hinder natural selection, the population will still not be able to find a local fitness optimum in hard fitness landscapes. Without arriving at a fitness optimum, the paradox of costly learning dissolves and the Hankshaw effect can allow for perpetual cooperation. This suggests that if we want a family of natural examples of evolution on hard fitness landscapes among more complex organisms then good candidates might be populations with costly learning or persistent cooperation. More generally, the non-vanishing supply of beneficial mutations on hard landscapes can allow selection to act on various mechanisms for evolvability [26] by letting the evolvability modifier alleles hitchhike on the favourable alleles that they produce.

These examples can be seen as instances of a more general observation on adaptationism. It is standard to frame adaptationism as “the claim that natural selection is the only important cause of the evolution of most nonmolecular traits and that these traits are locally optimal” [32]. Here, I showed that these are two independent claims. Even if we assume that (1) natural selection is the dominant cause of evolution then – on hard fitness landscapes – it does not follow that (2) traits will be locally optimal. Given the popularity of equilibrium assumptions in evolutionary biology, I expect that a number of other paradoxes and effects in addition to the Baldwin and

Hankshaw could be eased by recognizing the independence of these two claims. In particular, this gives a new account for maladaptation. Prior accounts rely on forces like deleterious mutation pressure, lack of genotypic variation, drift and inbreeding, and gene flow acting opposite natural selection resulting in a net zero force and thus a maladaptive equilibrium away from a fitness peak [2]. The ultimate constraint of computational complexity allows for perpetual maladaptive disequilibrium.

Currently, finding a species away from a local fitness peak is taken as motivation for further questions on what mechanisms or non-selective evolutionary forces cause this discrepancy. In this context, my results provide a general answer: hard landscapes allow adaptationist accounts for the absence of evolutionary equilibrium and maladaptation even in experimental models with static environments – and/or the absence of strong evolutionary forces working against natural selection – like the tRNA gene in yeast [17] or the long-term evolutionary experiment in *E. coli* [23]. By treating evolution as an algorithm, we see that time can be a limiting resource even on evolutionary timescales. These hard landscapes can be finite and deceptively simple – having only limited local epistasis or not having reciprocal sign-epistasis – and yet allow for unbounded fitness growth.

In contrast, a system found at a local fitness peak – like the snoRNA gene in yeast [16] – currently merits no further questions. The results in this report show that establishing evolutionary equilibrium should not be the end of the story. We need to also explain what features of the relevant fitness landscapes make them easy: i.e. explain why these fitness landscapes do not produce a computational constraint on evolution. For this, the tools of theoretical computer science can be used to refine our logical characterization of such fitness landscapes to guarantee that local peaks can be found in polynomial time. For example, we could consider limits on the topology of gene-interaction network (SA D.1), or the type of interaction possible between genes [33] to separate easy from hard landscapes. This opens new avenues for both empirical and theoretical work.

On easy landscapes, it is reasonable to assume that evolution finds locally-well-adapted genotypes or phenotypes. We can continue to reason from fitness peaks, debate questions of crossing fitness valleys, and seek solutions to Wright [1]’s problem of “a mechanism by which the species may contin-

ually find its way from lower to higher [local] peaks”. But with hard landscapes, it is better to think of evolution as open ended and unbounded. We will have to switch to a language of “adapting” rather than “adapted”. We will have to stop reasoning from equilibrium – as I did in the discussion of maintaining costly learning and cooperation. Finally, we will have to stop asking about the basins of attraction for local peaks and instead seek mechanisms that select which unbounded adaptive path evolution will follow. It is tempting to read this language of disequilibrium and negation of “locally adapted” as saying that organismal traits are not well honed to their environment. But we must resist this mistake and we must not let better be the enemy of good. Finding local optima in the hardest landscapes is a hard problem for any algorithm, not just biological evolution. In particular, it is also hard for scientists: on hard landscapes we cannot find optimal solutions either, and so the adapting answers of evolution can still seem marvelously well honed to us. And although I have focused on biological evolution, we can also look for hard landscapes in other fields. For example, these results translate directly to areas like business operation & innovation theory, where the NK-model is used explicitly [34, 35]. In physics, the correspondence between spin-glasses and the NK-model can let us look at energy minimization landscapes. In economics, classes of hard fixed-point problems similar to PLS are a lens on markets [28]. In all these cases, theoretical computer science and combinatorial optimization offer us the tools to make rigorous the distinction between easy and hard landscapes. They allow us to imagine hard landscapes not as low-dimensional mountain ranges but as high-dimensional mazes that we can search for effectively ever.

## Acknowledgements

I am grateful to Julian Xue for introducing me to the NK-model, and for many helpful comments and discussions; and to Peter Jeavons for extensive feedback and encouragement. This paper benefited from comments by Eric Bolo, Frederic Guichard, Marc Harper, Sergey Kryazhimskiy, Andriy Marusyk, Daniel Nichol, Prakash Panangaden, Joshua Plotkin, Jacob Scott, and participants of the 2014 Computational Theories of Evolution workshop at the Simons Institute for the Theory of Computing. This work was started while I was at the School of Computer Science, McGill University.

## Appendices

In the main text, I focused on the biological importance, interpretation, and implication of these results. In these appendices, I provide the formal proof of the results. Below, I formally define the concepts introduced within the body of the report and prove the theorems on which the conclusions are based. Some of this was first presented in the Kaznatcheev [36] preprint. The structure of the appendices is below:

- A Formal definitions of fitness functions, fitness landscapes, fitness graphs, and adaptive paths. I focus specific attention on epistasis (A.1) because it can be used to define broad families of landscapes, such as:
- B *Smooth fitness landscapes*: these are the source of a lot of intuition and early models of fitness landscapes. So, I briefly remind the reader of important properties of smooth landscapes.
- C *Semi-smooth fitness landscapes*: these share many properties in common with smooth fitness landscapes, and I prove a characterization Theorem 13 that is structured in a similar way to smooth landscapes. However, computationally, semi-smooth landscapes, unlike smooth ones, can be hard. In subsection C.1, I use the equivalence of semi-smooth fitness landscapes and acyclic unique-sink orientations of hyper-cubes to adapt hardness results from the analysis of simplex algorithms. This provides hard landscapes for fitter mutant SSWM dynamics. In the subsequent subsections, I show how to construct hard fitness landscapes for fittest mutant SSWM dynamics from specific start position (C.2) and random start position (C.3).
- D *NK-model of fitness landscapes*: this is a tunable rugged fitness landscape model that – unlike the previous two – can have many peaks. To analyze this model of landscapes, I review the complexity class PLS, show that the NK-model is PLS complete for  $K \geq 2$ , and discuss the generality of the results. In subsection D.1, I focus on easy instances of the NK-model and, in subsection D.2, provide an intuition for why assuming simple distributions on fitness landscapes is unreasonable and might have made the existence of hard families more difficult to spot.

To recap, I argue that local fitness optima may not be reachable in a reasonable amount of time even when allowing progressively more general and abstract evolutionary dynamics. For this generality, we pay with increasing complication in the corresponding fitness landscapes. This progression of results is summarized in Table 1 (which also serves as a guide for navigating the appendix). If we restrict our evolutionary dynamics to fitter or fittest mutant SSWM, then just sign epistasis is sufficient to ensure the existence of hard landscapes. If we allow any *adaptive* evolutionary dynamics, then reciprocal sign epistasis in the NK model with  $K \geq 2$  is sufficient for hard landscapes. If we want to show that arbitrary evolutionary dynamics cannot find local fitness optima then we need  $K \geq 2$  and the standard conjecture from computational complexity that  $FP \neq PLS$ .

| Landscape type | Max allowed epistasis type    | Hardness of reaching local optima                                                                                                                                                                                                                                                                                                                                                                   | Proved in...                                                           |
|----------------|-------------------------------|-----------------------------------------------------------------------------------------------------------------------------------------------------------------------------------------------------------------------------------------------------------------------------------------------------------------------------------------------------------------------------------------------------|------------------------------------------------------------------------|
| smooth         | magnitude ( $\uparrow$ )      | Easy for all strong-selection weak-mutation (SSWM) dynamics                                                                                                                                                                                                                                                                                                                                         | Section B                                                              |
| semi-smooth    | sign ( $\uparrow, \uparrow$ ) | Hard for SSWM with random fitter mutant or fittest mutant dynamics                                                                                                                                                                                                                                                                                                                                  | Theorems 14, 19, & 23                                                  |
| rugged         | reciprocal sign ( $\oplus$ )  | Hard for all SSWM dynamics: initial genotypes with all adaptive paths of exponential length<br>Hard for all evolutionary dynamics (if $FP \neq PLS$ )<br>Easy for finding approximate local peaks with moderate optimality gap: selection coefficients can drop-off as power law<br>Hard for approximate local peaks with small optimality gap: selection coefficient cannot drop-off exponentially | Corollary 27<br>Theorem 26<br>Theorem 31<br>Theorem 33<br>Corollary 34 |

Table 1: **Summary of main results.** Each landscape type (column 1) is characterized by the most complicated permitted type of epistasis (column 2; see A.1). Based on this, there are families of this landscape type that are easy or hard under progressively more general dynamics (column 3), which is proved in the corresponding part of the appendix (column 4).

### A Fitness landscapes, graphs, and adaptive paths

In 1932, Wright introduced the metaphor of a fitness landscape [1]. The landscape is a genetic space where each vertex is a possible genotype and an edge exists between two vertices if a single mutation transforms the genotype of one vertex into the other. In the case of a biallelic system we have  $n$  loci (positions), at each of which it is possible to have one of two alleles, thus our space is the  $n$ -bit binary strings  $\{0, 1\}^n$ . We could also look at spaces over larger alphabets; for example, 4 letters

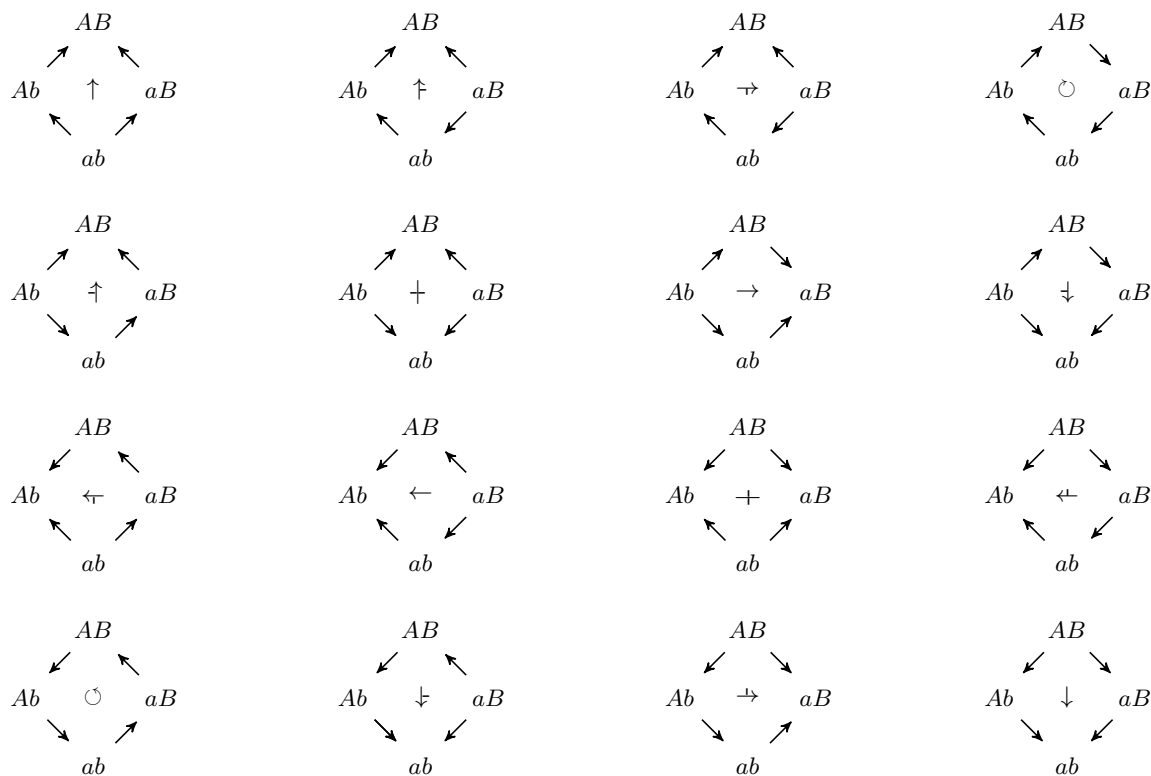

Figure 4: Three different kinds of epistasis possible in fitness graphs: no epistasis ( $\uparrow$ ), sign epistasis ( $\uparrow$ ,  $\uparrow$ ), and reciprocal sign epistasis ( $\uparrow$ ). Arrows in the fitness graph are directed from lower fitness genotypes towards mutationally adjacent higher fitness genotypes. In the middle of each fitness graph is a symbol showing the kind (and orientation) of epistasis. Note that the bottom left ( $\odot$ ) and top right ( $\odot$ ) fitness graphs violate transitivity.

for sequence space of DNA, or 20 letters for amino acids; but the biallelic system is sufficiently general for us. A mutation can flip any loci from one allele to the other, thus two strings  $x, y \in \{0, 1\}^n$  are adjacent if they differ in exactly one bit. Thus, the landscape is an  $n$ -dimensional hypercube with genotypes as vertexes. The last ingredient, fitness, is given by a function that maps each string to a non-negative real number. For the purposes of this report, the exact fitness values or their physical interpretations do not matter. Only their rank-ordering matters.

Individual organisms can be thought of as inhabiting the vertexes of the landscape corresponding to their genotype. And we imagine evolution as generally trying to ‘climb uphill’ on the landscape by moving to vertexes of higher fitness.

**Definition 1.** In a fitness landscape with fitness  $f$ , a path  $v_1 \dots v_t$  is called *adaptive* if each  $v_{i+1}$  differs from  $v_i$  by one bit and  $f(v_{i+1}) > f(v_i)$ .

For the most general evolutionary dynamics, the paths taken don’t have to be strictly increasing in fitness; i.e. they don’t have to necessarily be adaptive. If any evolutionary dynamic produces only adaptive paths, though, then it is called an *adaptive dynamic*.

Sometimes it is useful to represent a fitness landscape as a *fitness graph* by replacing the fitness function by a flow: for adjacent genotypes in the mutation-graph, direct the edges from the lower to the higher fitness genotype. This results in a characterization of fitness landscapes of a biallelic system as directed acyclic graphs on  $\{0, 1\}^n$ . Fitness peaks would correspond to sinks, and adaptive paths would correspond to paths that follow the edge directions of the DAG. I will consider a population at evolutionary equilibrium if it finds a local peak in the fitness landscape; i.e. a sink in the fitness graph. Crona, Greene, and Barlow [7] introduced this representation into theoretical biology, but fitness graphs have been used implicitly in earlier empirical studies of fitness landscapes [15, 37–39]. Using fitness graphs is particularly useful empirically because it is difficult to quantitatively compare fitnesses across experiments. However, if pairwise competitions are used to build an empirical fitness graph, it is important to verify that the graph is transitive (acyclic) [40]. In theoretical work, the fitness graph approach has made the proofs of some classical theorems relating local structure to global properties easier and shifts our attention to global algorithmic properties of evolution instead of specific numeric properties.



## A.1 Epistasis

*Epistasis* is a measure of the kind and amount of inter-loci interactions. Consider two loci with the first having alleles  $a$  or  $A$ , and the second  $b$  or  $B$ . Assume that the upper-case combination is more fit: i.e.  $f(ab) < f(AB)$ .

**Definition 2.** Two alleles are *non-interacting* if the fitness effects are additive and independent of background:  $f(AB) - f(aB) = f(AB) - f(ab)$ ,  $f(AB) - f(Ab) = f(aB) - f(ab)$ .

In *magnitude epistasis* this additivity is broken, but the signs remain:  $f(AB) > f(aB) > f(ab)$  and  $f(AB) > f(Ab) > f(ab)$ . The difference between non-interacting alleles and magnitude epistasis is not invariant under rank-order preserving transformation of the fitness function, thus I will not distinguish between the two types. Throughout the paper, I will use ‘no epistasis’ to mean both non-interacting alleles and magnitude epistasis, as the following definition makes explicit.

**Definition 3.** If  $f(AB) > f(aB) > f(ab)$  and  $f(AB) > f(Ab) > f(ab)$  then we will say that there is *no epistasis* between those alleles.

A system has sign epistasis if it violates one of the two conditions for magnitude epistasis. For example, if the second locus is  $b$  then the mutation from  $a$  to  $A$  is not adaptive, but if the second locus is  $B$  then the mutation from  $a$  to  $A$  is adaptive.

**Definition 4.** Given two loci, if  $f(AB) > f(aB) > f(ab) > f(Ab)$  then there is *sign epistasis* at the first locus.

Finally, a system has reciprocal sign epistasis if both conditions of magnitude epistasis are broken, or if we have sign epistasis on both loci [41].

**Definition 5.** Given two loci, if  $f(AB) \geq f(ab)$  but  $f(ab) > f(Ab)$  and  $f(ab) > f(aB)$  then there is *reciprocal sign epistasis* between those two loci.

Figure 4 visualizes all the fitness graphs on two loci and categorizes the type of epistasis present.

## B Smooth fitness landscapes

If a fitness landscape has no sign epistasis then it is a smooth landscape and has a single peak  $x^*$  [7, 9]. Every shortest path from an arbitrary  $x$  to  $x^*$  in the mutation-graph is an adaptive path – a flow in the fitness graph – and every adaptive path in the fitness graph is a shortest path in the mutation graph [7]. Thus, evolution can quickly find the global optimum in a smooth fitness landscape, with an adaptive path taking at most  $n$  steps: that is, all smooth fitness landscapes are easy landscapes. For an example, see the smooth *Escherichia coli*  $\beta$ -lactamase fitness landscape measured by Chou, Chiu, Delaney, Segre, and Marx [8] in Figure 2a.

**Proposition 6** ([7, 9]). *If there is no sign epistasis in a fitness landscape, then it is called a smooth landscape and has a single peak  $x^*$ . Every shortest path (ignoring edge directions) from an arbitrary genotype  $x$  to  $x^*$  is an adaptive path, and every adaptive path from  $x$  to  $x^*$  is a shortest path (ignoring edge directions).*

## C Semi-smooth fitness landscapes

Since a smooth landscape is always easy, let’s introduce the minimal amount of epistasis: sign epistasis, without any reciprocal sign epistasis.

**Definition 7.** A *semi-smooth fitness landscape* on  $\{0, 1\}^n$  with fitness function  $f$  is a fitness landscape that has no reciprocal sign epistasis. Such a fitness function  $f$  is also called semi-smooth.

For some of the following proofs, it will be useful to define sublandscapes.

**Definition 8.** Given a landscape on  $n$  bits, a sublandscape spanned by  $S \subseteq [n]$  is a landscape on  $\{0, 1\}^S$  where the alleles at the loci (indexes) in  $S$  can vary but the indexes in  $[n] - S$  are fixed according to some string  $u \in \{0, 1\}^{[n]-S}$ .

Note that the whole landscape is a sublandscape of itself (taking  $S = [n]$ ). For any  $S \subset [n]$ , there are  $2^{n-|S|}$  many sublandscapes on  $S$  corresponding to the possible  $u \in \{0, 1\}^{[n]-S}$ . Reciprocal sign epistasis between bits  $i$  and  $j$  corresponds to a sublandscape on  $\{i, j\}$  that has two distinct peaks.

Now, I can note a couple of important properties of semi-smooth landscapes:

**Proposition 9.** *If a fitness landscape on  $\{0, 1\}^n$  has some sublandscape with more than one distinct peak then it has reciprocal sign epistasis.*

The proof will show that a minimal multi-peak sublandscape must have size 2. I will do this by considering longest walks in a sublandscape. The proposition is similar to the one proved by Poelwijk, Sorin, Kiviet, and Tans [6], although my proof is distinct.

*Proof.* Let's consider a minimal sublandscape  $L$  that has more than one distinct peak: that means that if this sublandscape is spanned by  $S$  (i.e.  $\{0, 1\}^S$ ) then no sublandscape spanned by  $T \subset S$  has multiple peaks.

Since  $L$  is minimal, its peaks must differ from each other on each bit in  $S$ , for if there was a bit  $i \in S$  on which two peaks agreed then that bit could be fixed to that value and eliminated from  $S$  to make a smaller sublandscape spanned by  $S - \{i\}$  with two peaks. Thus, the minimal multipeak sublandscape has precisely two peaks. Call these peaks  $x^*$  and  $y^*$ .

**Claim:** In a minimal multipeak sublandscape, from each non-peak vertex, there must be a path to each peak.

Let's prove the claim by contradiction: Consider an arbitrary non-peak vertex  $x$ , and suppose it has no path to the  $x^*$  peak. Since any path from  $x$  in  $L$  must terminate at some peak, take the longest path from  $x$  to the peak  $y^*$  that it reaches, and let  $y$  be the last step in that path before the peak. Notice that  $y$  must only have one beneficial mutation (on bit  $i$ ), the one to the peak. For if it had more than one beneficial mutation, it could take the non-peak step to  $y'$  and then proceed from  $y'$  to  $y^*$  ( $x^*$  is not an option by assumption, and there are only two peaks in  $L$ ) and thus provide a longer path to the peak. Now consider the landscape on  $S - \{i\}$ , with the  $i$ th bit fixed to  $y_i$ . Since  $y_i$  is the same as  $x_i^*$  (both are opposite of  $y_i^*$ ),  $x^*$  is still a peak over  $S - \{i\}$ , but so is  $y$  (since its only beneficial mutation was eliminated by fixing  $i$  to  $y_i$ ). But this contradicts minimality, so no such  $x$  exists.

Now that we know that we can reach each peak from any vertex  $x$ , let us again consider the longest path from  $x$  to  $y^*$  with  $y$  as the last step in that path before the peak, and  $i$  as the position of the last beneficial mutation. Since all non-peak vertices must reach both peaks, there must be some other beneficial mutation  $j$  from  $y$  to  $x'$  that eventually leads to  $x^*$ . But if  $x'$  is not a peak then it must also have a way to reach  $y^*$ , but then we could make a longer path, contradicting the construction of  $y$ . Thus  $x'$  must be the peak  $x^*$ .

This means that  $x^*$  and  $y^*$  differ in only the two bits  $i$  and  $j$ . But in a minimal multi-peaked sublandscape they must differ in all bits, so  $S = \{i, j\}$ ; i.e. this sublandscape is an example of reciprocal sign epistasis.  $\square$

**Corollary 10.** *A fitness landscape without reciprocal sign epistasis has a unique single peak.*

*Proof.* This follows from the contrapositive of Proposition 9, since the whole landscape is a sublandscape of itself.  $\square$

The above results can also be restated in the terminology used to analyze simplex algorithms.[10, 13]

**Definition 11.** A directed acyclic orientation of a hypercube  $\{0, 1\}^n$  is called an *acyclic unique sink orientation (AUSO)* if every subcube (face; including the whole cube) has a unique sink.

This makes the contrapositive of Proposition 9 into the following proposition:

**Proposition 12.** *A semi-smooth fitness landscape is an AUSO*

**Theorem 13.** *A semi-smooth fitness landscape has a unique fitness peak  $x^*$  and for any vertex  $x$  in the landscape, there exists a path of length  $\|x^* \oplus x\|_1$  (Hamming distance to peak) from  $x$  to the peak.*

*Proof.* The unique peak  $x^*$  is just a restatement of Corollary 10. To show that there is always a path of Hamming distance to the peak, I will show that given an arbitrary  $x$ , we can always pick a mutation  $k$  that decreases the Hamming distance to  $x^*$  by 1.

Let  $S$  be the set of indexes that  $x$  and  $x^*$  disagree on,  $|S| = \|x^* \oplus x\|_1$ . Consider the sub-landscape on  $S$  with the other bits fixed to what  $x$  and  $x^*$  agree on. In this sublandscape  $x^*$  is a peak, thus by Proposition 9  $x$  isn't a peak and must have some beneficial mutation  $k \in S$ . This is the  $k$  we were looking for.  $\square$

Note that this proof specifies an algorithm for constructing a short adaptive walk to the fitness peak  $x^*$ . However, this algorithm requires knowing  $x^*$  ahead of time – i.e. seeing the peak in the distance. But evolution does not know ahead of time where peaks are, and so cannot carry out this algorithm. Even though a short path to the peak always exists, evolutionary dynamics might not follow it.

## C.1 Hard landscapes for random fitter SSWM

The simplest evolutionary rule to consider is picking a mutation uniformly at random among ones that increase fitness. This can be restated as picking and following one of the out-edges in the fitness graph at random; i.e. this is equivalent to the random-edge simplex pivot rule [13]. Proposition 12 allows me to use the hard AUSOs constructed by Matousek and Szabo [13] as a family of hard semi-smooth landscapes.

**Theorem 14** ([13] in biological terminology). *There exist semi-smooth fitness landscapes on  $\{0, 1\}^n$  such that SSWM dynamics starting from a random vertex, with probability at least  $1 - e^{-\Omega(n^{1/3})}$  follows an adaptive path of at least  $e^{\Omega(n^{1/3})}$  steps to evolutionary equilibrium.*

In other words, multiple peaks – or even reciprocal sign-epistasis – are not required to make a complex fitness landscape. In fact, AUSOs were developed to capture the idea of a linear function on a polytope (although AUSOs are a slightly bigger class). It is not surprising to find the simplex algorithm in the context of semi-smooth landscapes, since we can regard it as a local search algorithm for linear programming where local optimality coincides with global optimality. Linear fitness functions are usually considered to be some of the simplest landscapes by theoretical biologists; showing that adaptation is hard on these landscapes (or ones like them) is a surprising result.

## C.2 Construction of hard semi-smooth landscapes for fittest SSWM

One might object to taking random fitter mutants because sometimes the selected mutations are only marginally fitter than the wildtype. It might seem natural to speed-up evolution by always selecting the fittest possible mutant. Here I show that, in general, this does not help.

Consider a fitness landscape on  $\{0, 1\}^m$  with semi-smooth fitness function  $f$  that if started at  $0^m$  will take  $k$  steps to reach its evolutionary equilibrium at  $x^*$ . I will show how to grow this into a fitness landscape on  $\{0, 1\}^{m+2}$  with semi-smooth fitness function  $f'$  that if started at  $0^{m+2}$  will take  $2(k+1)$  steps to reach its evolutionary equilibrium at  $0^m 11$ .

For simplicity of analysis, let us define the following functions and variables for all points in  $\{0, 1\}^m$  that aren't an evolutionary equilibrium under  $f$ ; i.e. all except  $x^*$ . Let

$$s^+(x) = \max_{y \in N(x) \text{ s.t. } f(y) > f(x)} f(y) - f(x) \quad (1)$$

and

$$s^-(x) = \min_{y \in N(x) \text{ s.t. } f(x) + s^+(x) > f(y) > f(x)} f(y) - f(x) \quad (2)$$

where  $N(x)$  are the neighbours of  $x$  in the mutation graphs; i.e. genotypes that differ from  $x$  in one bit.

Now overload these into constants, as follows: define  $s^+ = \min_x s^+(x)$  and  $s^- = \min_x s^-(x)$ . Suppose that  $f$  is such that  $s^- < s^+$ ; otherwise set  $s^- = s^+/2$  (do this also, if  $N(x)$  s.t.  $f(x) + s^+(x) > f(y) > f(x)$  is empty for some non-equilibrium  $x$ ).

Let  $x \oplus y$  mean the XOR between  $x$  and  $y$ . Consider the 'reflected' function  $f(x \oplus x^*)$ . Note that if  $f(x)$  is semi-smooth then so is  $f(x \oplus x^*)$ , since it just relabels the directions of some dimensions. The reflected function preserves all the important structure. In particular, if under  $f(x)$  it took  $k$  steps to go from  $0^m$  to  $x^*$  then under  $f(x \oplus x^*)$  it will take  $k$  steps to go from  $x^*$  to  $0^m$ .

Now define  $f' : \{0, 1\}^{m+2} \rightarrow \mathbb{R}$  as:

$$f'(xab) = \begin{cases} f(x) & \text{if } a = b = 0 \\ f(x) + s^- & \text{if } a \neq b \text{ and } x \neq x^* \\ f(x^*) + s^- & \text{if } a = 0, b = 1 \text{ and } x = x^* \\ f(x^*) + s^+ & \text{if } a = 1, b = 0 \text{ and } x = x^* \\ f(x \oplus x^*) + f(x^*) + 2s^+ & \text{if } a = b = 1 \end{cases} \quad (3)$$

Basically the  $x00$  subcube is the original landscape, the  $x10$  and  $x01$  subcubes serve as 'buffers' to make sure that the walk doesn't leave the first subcube before reaching  $x^*00$ , and the  $x11$  is the original landscape reflected around  $x^*$  that takes us from  $x^*11$  to  $0^m 11$ .

Notice, that  $f'$  has the same  $s^+$  and  $s^-$  as  $f$ .

Now we just need to establish some properties:

**Proposition 15.** *Fittest mutant SSWM dynamics will not leave the  $\{0, 1\}^m 00$  subcube until reaching  $x^*00$ .*

*Proof.* By definition, the fittest mutant (i.e. neighbour over  $\{0, 1\}^m$ ) from each genotype  $x \in \{0, 1\}^m$  that isn't  $x^*$  in  $f$ , has a fitness advantage of  $s^+$  or higher. Hence adding two extra edges from  $x00$  to  $x10$  and  $x01$ , each with fitness advantage  $s^- < s^+$  will not change the edge that fittest-mutant SSWM picks.  $\square$

**Proposition 16.** *SSWM dynamics will not leave the  $\{0, 1\}^m 11$  subcube after entering it.*

*Proof.* This is because  $f'$  has strictly greater fitness on the  $\{0, 1\}^m 11$  subcube than on the other three subcubes. Confirming this, note that for every  $x \in \{0, 1\}^m$ :

$$\begin{aligned}
 f(x \oplus x^*) + f(x^*) + 2s^+ &\geq f(x^*) + 2s^+ && \text{since } f \text{ is non-negative} && (4) \\
 &\geq f(x^*) + s^+ && \text{since } s^+ > 0 && (5) \\
 &\geq f(x^*) + s^- && \text{since } s^+ > s^- && (6) \\
 &\geq f(x) + s^- && \text{since } x^* \text{ is fitness peak of } f && (7) \\
 &\geq f(x) && \text{since } s^- > 0 && (8)
 \end{aligned}$$

□

**Proposition 17.** *If  $f$  on  $\{0, 1\}^m$  has no reciprocal sign-epistasis then  $f'$  on  $\{0, 1\}^{m+2}$  has no reciprocal sign-epistasis.*

*Proof.* Consider any pair of genes  $i, j \in [m]$ . Among these first  $m$  genes, depending the last two bits, we are looking at landscapes on  $\{0, 1\}^m 00$ ,  $\{0, 1\}^m 01$ ,  $\{0, 1\}^m 10$ , or  $\{0, 1\}^m 11$ , with the fitness given by  $f(x), f(x) + s^-, f(x) + s^+$ , or  $f(x \oplus x^*) + f(x^*) + 2s^+$  (respectively). All these landscapes have isomorphic combinatorial structure to  $f$  and thus the same kinds of epistasis. Since  $f$  has no reciprocal sign-epistasis, all these subcubes lack it, too.

Now, let's look at the case of where the gene pair goes outside the first  $m$  genes. Consider an arbitrary gene  $i \in [m]$ , let  $u \in \{0, 1\}^{i-1}$ ,  $v \in \{0, 1\}^{m-i}$  be arbitrary. Label  $a, A \in \{0, 1\}$  such that  $f(uav) < f(uAv)$ . look at the subcube  $u\{0, 1\}v\{0, 1\}^2$ :

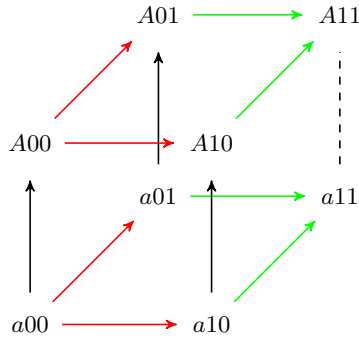

The solid black edges have their directions from the definition of  $a$  and  $A$ . The red edges have their direction because  $s^+ > s^- > 0$ . The green edges have their direction because of Prop. 16. The direction of the dotted black edge will depend on if  $x^*$  contains 0 (point up) or 1 (point down) at position  $i$ , but regardless of the direction, no reciprocal sign epistasis is introduced.

□

**Corollary 18.** *Given  $f'$  on  $\{0, 1\}^{m+2}$ , the fittest mutant SSWM dynamics starting at  $0^{m+2}$  will take  $2(k+1)$  steps to reach its unique fitness peak at  $0^m 11$ .*

*Proof.* By Prop. 15, the walk will first proceed to  $x^*00$  taking  $k$  steps. From  $x^*00$ , there are only two adaptive mutations  $x^*10$  or  $x^*01$ , and the first is fitter. From  $x^*10$  there is only a single adaptive mutation (to  $x^*11$ ), taking us to  $k+2$  steps. From  $x^*11$ , by Prop. 16, it will take us  $k$  more steps to reach  $0^m 11$ ; totaling  $2(k+1)$  steps. □

**Theorem 19.** *There exist semi-smooth fitness landscapes on  $2n$  loci that take  $2^{n+1} - 2$  fittest mutant steps to reach their unique fitness peak at  $0^{2(n-1)} 11$  when starting from  $0^{2n}$ .*

*Proof.* We will build the family of landscapes inductively using our construction, starting from an initial landscape:

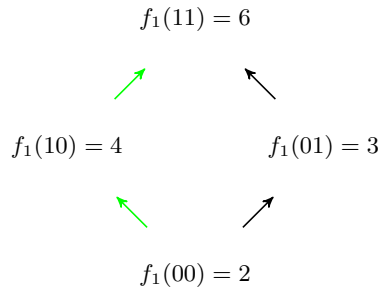

The resulting path length  $T_n$  will be given by the recurrence equation:  $T_{n+1} = 2T_n + 2$  with  $T_1 = 2$ . This recurrence is solved by  $T_n = 2^{n+1} - 2$ . □

Call the landscapes constructed as in the above proof, a *winding landscapes*. A visual example of the winding landscape construction on 6 loci ( $n = 3$  in Theorem 19) is given in Figure 3. The winding landscapes construction is similar to Horn, Goldberg, and Deb [42]’s *Root2path* construction, except their approach introduced reciprocal sign epistasis despite having a single peak.

Of course, this is an arbitrary initial fitness landscape and any semi-smooth landscape can be used as a starting point; the walk would still scale exponentially, but there would be a different initial condition. Further, this winding product construction I showed above is just one example for building families. Many more could be considered.

In particular, if we are interested in larger mutation operators like  $k$ -point mutations instead of just 1-point mutations then it is relatively straightforward to modify the winding landscape construction. As written, equation 3 uses a buffer of 2 bits in  $f'(xab)$  to transition from  $f(x)$  to its reflection  $f(x \oplus x^*)$ . In the more general setting, we’d pad the buffer to be  $k + 1$  bits: define  $f'(xy)$  where  $|y| = k + 1$  with a smooth landscape on the  $y$  portion of the input taking us from  $f(x)$  to its reflection. Which leaves most of the above arguments unchanged, only modifying Theorem 19 to have the landscape to be on  $kn$  loci and the recurrence relation at the end of the proof to be  $T_{n+1} = 2T_n + k + 1$ .

### C.3 Hard landscapes from random start

Unfortunately, one might not be impressed by a result that requires starting from a specific genotype like  $0^m$  and ask for the expected length of the walk starting from a random vertex. Of course, if a genotype on this long walk is chosen as a starting point then the walk will still be long in most cases. However, there are only  $2^{n+1} - 2$  vertexes in the walk, among  $2^{2n}$  vertexes total, so the probability of landing on the walk is exponentially small. Instead, I will rely on direct sums of landscapes and Proposition 15 to get long expected walks.

**Proposition 20.** *With probability 1/4, a winding landscape on  $2n$  loci will take  $2^n$  or more fittest mutant steps to reach the fitness peak from a starting genotype sampled uniformly at random.*

*Proof.* With probability 1/4, the randomly sampled starting vertex has the form  $x00$  (i.e. its last two bits are 0s). By prop. 15, the walk can’t leave the  $\{0, 1\}^{2(n-1)}00$  landscape until reaching its peak at  $0^{2(n-2)}1100$ . This might happen quickly, or it might even already be at that peak. But after, it has to follow the two steps to  $0^{2(n-2)}1111$  and then due to prop. 16 it will have to follow the normal long path, taking  $2^n - 2$  more steps. □

Because of the constant probability of an exponentially long walk, we can get a big lower bound on the expected walk time:

**Corollary 21.** *Fittest mutant dynamics starting from a uniformly random genotype will have an expected walk length greater than  $2^{n-2}$  on a  $2n$ -loci winding landscape.*

*Proof.* With probability 1/4, the the walk takes  $2^n$  or more steps, and with probability 3/4 it takes 0 or more steps. Thus the expected walk length is greater than or equal to  $(1/4) * 2^n + (3/4) * 0 = 2^{n-2}$ . □

However, 75% of the time, we can’t make a guarantee of long dynamics. We can overcome this limitation by taking direct sums of landscapes.

**Definition 22.** Given two fitness landscapes, one with fitness  $f_1$  on  $\{0, 1\}^{n_1}$  and the other with fitness  $f_2$  on  $\{0, 1\}^{n_2}$ , the *direct sum*  $(f_1 \oplus f_2)$  is a landscape with fitness  $f$  on  $\{0, 1\}^{n_1+n_2}$  where  $f(xy) = f_1(x) + f_2(y)$ .

Now, for any probability of failure  $0 < \delta < 1$ , let  $m_\delta = \lceil \frac{\log \frac{1}{\delta}}{2 - \log 3} \rceil$  (where  $\log$  is base 2).

**Theorem 23.** *There exist semi-smooth fitness landscapes on  $2nm_\delta$  loci that with probability  $1 - \delta$ , take  $2^n$  or more fittest mutant steps to reach their fitness peak from a starting genotype sampled uniformly at random.*

*Proof.* Consider a landscape that is the direct sum of  $m_\delta$  separate  $2n$ -loci winding landscapes. Since each constituent is semi-smooth and since sums don't introduce epistasis, the resulting 'tensor sum' landscape is also semi-smooth. Further, to reach its single peak, the walk has to reach the peak of each of the  $m_\delta$  independent winding sublandscapes. But as long as at least one sublandscape has a long walk, we are happy. By prop. 20, we know that for each sublandscape, we will have a short-walk starting genotype with probability less than  $3/4$ . The probability that none of them get a long walk then is less than  $(3/4)^{m_\delta} \leq \delta$ .  $\square$

## D NK model with $K \geq 2$ is PLS-complete

**Definition 24** ([18, 19, 43]). The *NK model* is a fitness landscape on  $\{0, 1\}^n$ . The  $n$  loci are arranged in a *gene-interaction network* where each locus  $x_i$  is linked to  $K$  other loci  $x_1^i, \dots, x_K^i$  and has an associated fitness contribution function  $f_i : \{0, 1\}^{K+1} \rightarrow \mathbb{R}_+$ . Given a vertex  $v \in \{0, 1\}^n$ , we define the fitness  $f(x) = \sum_{i=1}^n f_i(x_i x_1^i \dots x_K^i)$ .

By varying  $K$  we can control the amount of epistasis in the landscape. The model also provides an upper bound of  $n \binom{K+1}{2}$  on the number of gene pairs that have epistatic interactions.

Weinberger [44] showed that checking if the global optimum in an *NK model* is greater than some input value  $V$  is *NP*-complete for  $K \geq 3$ . Although this implies that finding a global optimum is difficult, it says nothing about local optima. As such, it has generated little interest among biologists, although it spurred interest as a model in the evolutionary algorithms literature, leading to a refined proof of *NP*-completeness for  $K \geq 2$  [45].

To understand the difficulty of finding items with some local property like being an equilibrium, Johnson, Papadimitriou & Yannakakis [27] defined the complexity class of polynomial local search (PLS). A problem is in PLS if it can be specified by three polynomial time algorithms [28]:

1. An algorithm  $I$  that accepts an instance (like a description of a fitness landscape) and outputs a first candidate to consider (the initial genotype).
2. An algorithm  $F$  that accepts an instance and a candidate and returns a objective function value (i.e. computes the fitness).
3. An algorithm  $M$  that accepts an instance and a candidate and returns an output with a strictly higher objective function value, or says that the candidate is a local maximum.

We consider a PLS problem solved if an algorithm can output a locally optimal solution for every instance. This algorithm does not necessarily have to use  $I$ ,  $F$ , or  $M$  or follow adaptive paths. For instance, it can try to uncover hidden structure from the description of the landscape. A classical example would be the ellipsoid method for linear programming. The hardest problems in PLS – i.e. ones for which a polynomial time solution could be converted to a solution for any other PLS problem – are called PLS-complete. It is believed that PLS-complete problems are not solvable in polynomial time (i.e.  $\text{FP} \neq \text{PLS}$ ), but – much like the famous  $\text{P} \neq \text{NP}$  question – this conjecture remains open. Note that finding local optima on fitness landscapes is an example of a PLS problem, where  $I$  is your method for choosing the initial genotype,  $F$  is the fitness function, and  $M$  computes an individual adaptive step.

**Definition 25** (Weighted 2SAT). Consider  $n$  variables  $x = x_1 \dots x_n \in \{0, 1\}^n$  and  $m$  clauses  $C_1, \dots, C_m$  and associated positive integer weights  $c_1, \dots, c_m$ . Each clause  $C_k$  contains two literals (a literal is a variable  $x_i$  or its negation  $\bar{x}_i$ ), and contributes  $c_k$  to the fitness if at least one of the literals is satisfied, and nothing if neither literal is satisfied. The total fitness  $c(x)$  is the sum of the individual contributions of the  $m$  clauses. Two assignments  $x$  and  $x'$  are adjacent if there is exactly one index  $i$  such that  $x_i \neq x'_i$ . We want to maximize fitness.

The Weighted 2SAT problem is PLS-complete [46]. To show that the *NK model* is also PLS-complete, I will show how to reduce any instance of Weighted 2SAT to an instance of the *NK model*.

**Theorem 26.** *Finding a local optimum in the NK fitness landscape with  $K \geq 2$  is PLS-complete.*

*Proof.* Consider an instance of Weighted 2SAT with variables  $x_1, \dots, x_n$ , clauses  $C_1, \dots, C_m$  and positive integer costs  $c_1, \dots, c_m$ . We will build a landscape with  $m + n$  loci, with the first  $m$  labeled  $b_1, \dots, b_m$  and the next  $n$  labeled  $x_1, \dots, x_n$ . Each  $b_k$  will correspond to a clause  $C_k$  that uses the variables  $x_i$  and  $x_j$  (i.e., the first literal is either  $x_i$  or  $\bar{x}_i$  and the second is  $x_j$  or  $\bar{x}_j$ ; set  $i < j$  to avoid ambiguity). Define the corresponding fitness effect of the locus as:

$$f_k(0x_i x_j) = \begin{cases} c_k & \text{if } C_k \text{ is satisfied} \\ 0 & \text{otherwise} \end{cases} \quad (9)$$

$$f_k(1x_i x_j) = f_k(0x_i x_j) + 1 \quad (10)$$

Link the  $x_i$  arbitrarily (say to  $x_{(i \bmod n)+1}$  and  $x_{(i+1 \bmod n)+1}$ , or to nothing at all) with a fitness effect of zero, regardless of the values.

In any local maximum  $bx$ , we have  $b = 11..1$  and  $f(x) = m + c(x)$ . On the subcube with  $b = 11..1$  Weighted 2SAT and this NK model have the same exact fitness graph structure, and so there is a bijection between their local maxima.  $\square$

Assuming – as most computer scientists do – that there exists some problem in PLS not solvable in polynomial time (i.e.  $FP \neq PLS$ ), then Theorem 26 implies that no matter what mechanistic rule evolution follows (even ones we have not discovered, yet), be it as simple as SSWM or as complicated as any polynomial time algorithm, there will be NK landscapes with  $K = 2$  such that evolution will not be able to find a fitness peak efficiently. But if we focus only on rules that follow adaptive paths then we can strengthen the result:

**Corollary 27.** *There is a constant  $c > 0$  such that, for infinitely many  $n$ , there are instances of NK models (with  $K \geq 2$ ) on  $\{0, 1\}^n$  and initial genotype  $v$  such that any adaptive path from  $v$  will have to take at least  $2^{cn}$  steps before finding a fitness peak.*

*Proof.* If the initial vertex has  $s = 11..1$  then there is a bijection between adaptive paths in the fitness landscape and any weight-increasing path for optimizing the weighted 2SAT problem. Thus, Schaffer and Yannakakis [46]’s Theorem 5.15 applies.  $\square$

This result holds independent of any complexity theoretic assumptions about the relationship between polynomial-time and PLS. Hence, there are some landscapes and initial genotypes, such that any rule we use for adaptation that only considers fitter single-gene mutants will take an exponential number of steps to find the local optimum.

If we turn to larger mutational neighbourhoods than single-gene mutants then – due to the large class of possible adaptive dynamics – a variant of Corollary 27 will have to be reproved (often using a buffer padding argument similar to the end of section C.2) but Theorem 26 is unaffected:

**Corollary 28.** *For any definition of local equilibrium with respect to a mutation neighbourhood that contains point-mutations as a subset (i.e. if  $\forall x \{y \mid \|y - x\|_1 = 1\} \subseteq N(x)$ ), the NK model with  $K \geq 2$  is PLS-hard.*

*Proof.* Any mutation operator that is a superset of point-mutations will only decrease the number of evolutionary equilibria without introducing new ones. Thus, it will only make the task of finding that equilibrium (just as, or) more difficult. However, since the algorithms studied by PLS do not have to use the mutation operator during their execution, changing it does not give them any more computational resources.  $\square$

Finally, it is important to see the NK-model as an example model, albeit a simple and natural one. If we consider more complex models of fitness landscapes – say dynamic fitness landscapes – it is often the case that there is some parameter or limit that produces the special case of a static fitness landscape like the NK-model. In particular, static landscapes are often a sub-model of dynamic fitness landscapes and thus solving dynamic fitness landscapes can only be more difficult than static ones.

## D.1 Easy instances of NK-model

Note that this doesn’t mean that all instances of the NK-model are hard. In fact, there are natural sub-families of the NK-model that are easy.

The simplest easy family is  $K = 0$ . In that case, the genes are non-interacting and we have a smooth fitness landscapes. And all smooth landscapes are easy. For  $K = 1$ , Wright, Thompson, and Zhang [45] presented a dynamic programming approach that can find the global fitness peak in polynomial time. Since we could use this as our algorithm  $I$  to pick the initial genotype, this means the model cannot be PLS-complete for  $K \leq 1$  (unless  $PLS = P$ , in which case all local search problems are easy). This means that Theorem 26 is as tight as possible in terms of  $K$ .

Alternatively, instead of restricting  $K$ , we can restrict how the gene-interaction network is connected. It will come in useful to visualize these gene-interaction networks by drawing an edge directed from a focal locus to the  $K$  loci that affect its fitness contribution. For example, if the genes can be arranged in a circle and a focal gene can interact with only the next  $K$  genes in the circle then there is a polynomial time dynamic programming algorithm to find an evolutionary equilibrium [45]. Thus, this restricted model cannot be PLS complete for any constant  $K$ .

It is an open question if SSWM dynamics – or some other reasonable evolutionary dynamics – is sufficient in the cases of  $K = 1$  and circular arrangements. I conjecture that adaptive dynamics are sufficient in these cases, but proof of this is left for future work.

## D.2 Distributions and random fitness landscapes

The  $NK$  model is frequently studied through simulation, or statistical mechanics approaches. In a typical biological treatment, the gene-interaction network is assumed to be something simple like a generalized cycle (where  $x_i$  is linked to  $x_{i+1}, \dots, x_{i+K}$ ) or a random  $K$ -regular graph. The fitness contributions  $f_i$  are usually sampled from some choice of distribution. As such, we can think of biologists as doing average case analysis of these fitness landscapes. Given that randomly sampling landscapes can introduce structure like short paths [47], the structure of this simple sampling led prior research to miss the possibility of exponentially long walks. There has been a disconnect between theory and data [12, 48]. Since there is no empirical or theoretically sound justification for the choice of distributions, I avoid relying on a simple generating distribution and instead reason from only the logical description of the model. That way we know that our results are features of the logic that characterizes a particular family of fitness landscapes and not artifacts of a simple sampling distribution.

If a single sampling distribution is required despite very little or no data on the distribution of fitness landscapes in nature then it is tempting to turn to Occam's razor and consider simpler landscapes as more likely. This can be done by sampling landscapes with negative log probability proportional to their minimum description length, i.e. according to the Kolmogorov universal distribution. If landscapes are sampled in this way then all the orders of magnitude for hardness results established herein are expected to hold [49].

## D.3 Approximate peaks

Finally, let us also consider relaxations of equilibrium, and being "close" to a peak instead of exactly at one. For this, we need to use the whole numeric structure of the fitness function  $f$  and not just the rank-ordering that was sufficient until this point. The following definitions and proofs are based on combinatorial optimization results by Orlin, Punnen, and Schulz [20].

**Definition 29.** A genotype  $x$  is at an  $s$ -approximate peak if  $\forall y \in N(x) f(y) \leq (1+s)f(x)$ .

The question becomes how big does  $s$  have to be for evolution to find an  $s$ -approximate peak. But since there is no absolute units of fitness, we will need to define  $f_\delta = \min_x \min_{y \in N(x) \text{ s.t. } f(y) > f(x)} (f(y) - f(x))$  and  $f_{\max} = \max_x f(x)$ .

First, it is important to note that all landscapes where  $f_\delta$  isn't small compared to  $f_{\max}$  are easy.

**Proposition 30.** If  $f_{\max}/f_\delta \in O(n^k)$  for some constant  $k$  then an exact peak can be found in a polynomial in  $n$  number of mutations by any adaptive dynamic.

*Proof.* Since each adaptive step increases fitness by at least  $f_\delta$  then after  $t$  adaptive steps, we have  $f(x_t) \geq f_\delta t$ . Combine this with  $f(x_t) \leq f_{\max}$  to get that  $t \leq f_{\max}/f_\delta$ .  $\square$

So, we need to focus on bigger gaps between  $f_\delta$  and  $f_{\max}$ . If the gap is exponential then we can find approximate peak for moderate sized  $s$  on any landscape.

**Theorem 31.** If  $\log(f_{\max}/f_\delta) \in O(n^k)$  then fittest mutant SSWM dynamics can find a local  $s$ -approximate peak in time polynomial in  $n$  and  $\frac{1}{s}$ .

*Proof.* Let  $x_0$  be the initial genotype, if it is an exact peak then we are done. Otherwise, let  $x_1$  be the next adaptive step, by definition of  $f_\delta$ , we have that  $f(x_1) \geq f(x_0) + f_\delta \geq f_\delta$ . Now, consider an adaptive path  $x_1 \dots x_t$  that hasn't encountered an  $s$ -approximate peak; i.e. a mutation was always available such that  $f(x_{i+1}) > (1+s)f(x_i)$ . Thus, we have that  $f(x_t) \leq f_{\max}$  and that  $f(x_t) \geq (1+s)^t f_1 \geq (1+s)^t f_\delta$ . Putting these two together:

$$(1+s)^t f_\delta \leq f_{\max} \quad (11)$$

$$t \ln(1+s) \leq \ln \frac{f_{\max}}{f_\delta} \quad (12)$$

$$t \leq (\ln \frac{f_{\max}}{f_\delta}) / \ln(1+s) \quad (13)$$

$$\leq (1+1/s) \ln \frac{f_{\max}}{f_\delta} \quad (14)$$

Where I used  $\ln(1+s) \geq \frac{s}{1+s}$  in the last step. Combining with the conditions on  $\log f_{\max}/f_\delta$ , we get:  $t \in O(\frac{n^k}{s})$ .  $\square$

But for very small  $s$ , finding an approximate peak is as hard as finding an exact peak.

**Proposition 32.** If  $s \leq f_\delta/f_{\max}$  then any  $s$ -approximate peak is a (exact) local peak.

*Proof.* If an  $s$ -approximate peak at  $x$  is not an exact peak then there exists a  $y \in N(x)$  such that  $f(y) - f(x) \geq f_\delta$  but  $f(y) < (1+s)f(x)$ . Combining this with  $f(x) \leq f_{\max}$ , we get that  $s > f_\delta/f_{\max}$ .  $\square$



Thus, it isn't possible to find an  $s$ -approximate peak for very small  $s$  on hard fitness landscapes:

**Theorem 33.** *If  $PLS \neq P$  and  $\log(f_{\max}/f_{\delta}) \in O(n^k)$  then (for NK-model with  $K \geq 2$ ) a local  $s$ -approximate peak cannot be found in time polynomial in  $n$  and  $\log \frac{1}{s}$ .*

*Proof.* If such an algorithm existed then we'd run it with  $s = f_{\delta}/f_{\max}$  and – by Proposition 32 – the approximate peak it finds would be exact. Further, in this case  $\log \frac{1}{s} = \log(f_{\max}/f_{\delta}) \in O(n^k)$  and thus the runtime would be polynomial in  $n$ . This is not possible for the NK-model with  $K \geq 2$  by Theorem 26 (unless  $PLS = P$ ).  $\square$

This also means that the selective coefficient of the fittest mutant  $s(t) = \max_{y \in N(x_t) \cup \{x_t\}} (f(y) - f(x_t))/f(x_t)$  cannot decay exponentially quickly.

**Corollary 34.** *If  $PLS \neq P$  then there are no evolutionary dynamics such that  $s(t) \leq e^{-mt}$  for all instances of the NK-model with  $K \geq 2$ .*

Contrast this with the always achievable power-law decrease in  $s(t)$ .

## Main Text & Appendix References

1. Wright, S. The roles of mutation, inbreeding, crossbreeding, and selection in evolution. *Proceedings of the Sixth International Congress of Genetics* 1932:356–366.
2. Crespi, BJ. The evolution of maladaptation. *Heredity* 2000;84:623.
3. Mayr, E. Cause and effect in biology. *Science* 1961;134:1501–1506.
4. Ariew, A. Ernst Mayr's 'ultimate/proximate' distinction reconsidered and reconstructed. *Biology and Philosophy* 2003;18:553–565.
5. Obolski, U, Ram, Y, and Hadany, L. Key Issues Review: Evolution on rugged adaptive landscapes. *bioRxiv* 2017:112177.
6. Poelwijk, F, Sorin, T-N, Kiviet, D, and Tans, S. Reciprocal sign epistasis is a necessary condition for multi-peaked fitness landscapes. *Journal of Theoretical Biology* 2011;272:141–144.
7. Crona, K, Greene, D, and Barlow, M. The peaks and geometry of fitness landscapes. *Journal of Theoretical Biology* 2013;317:1–10.
8. Chou, HH, Chiu, HC, Delaney, NF, Segre, D, and Marx, CJ. Diminishing returns epistasis among beneficial mutations decelerates adaptation. *Science* 332 2011;6034:1190–1192.
9. Weinreich, D, Watson, R, and Chan, L. Sign epistasis and genetic constraint on evolutionary trajectories. *Evolution* 2005;59:1165–1174.
10. Szabó, T and Welzl, E. Unique sink orientations of cubes. In: *Foundations of Computer Science, 2001. Proceedings. 42nd IEEE Symposium on.* IEEE. 2001:547–555.
11. Gillespie, J. A simple stochastic gene substitution model. *Theor. Pop. Biol.* 1983;23:202.
12. Orr, HA. The genetic theory of adaptation: a brief history. *Nature Reviews. Genetics* 2005;6:119–127.
13. Matousek, J and Szabo, T. RANDOM EDGE can be exponential on abstract cubes. *Advances in Mathematics* 1 2006;204:262–277.
14. Lozovsky, ER, Chookajorn, T, Brown, KM, et al. Stepwise acquisition of pyrimethamine resistance in the malaria parasite. *Proc. Natl. Acad. Sci. USA* 29 2009;106:12025–12030.
15. Szendro, I, Schenk, M, Franke, J, Krug, J, and de Visser, J. Quantitative analyses of empirical fitness landscapes. *J. Stat. Mech.* 2013:p01005.
16. Puchta, O, Cseke, B, Czaja, H, Tollervey, D, Sanguinetti, G, and Kudla, G. Network of epistatic interactions within a yeast snoRNA. *Science* 2016;352:840–844.
17. Li, C, Qian, W, Maclean, CJ, and Zhang, J. The fitness landscape of a tRNA gene. *Science* 2016;352:837–840.
18. Kauffman, S and Levin, S. Towards a general theory of adaptive walks on rugged landscapes. *Journal of Theoretical Biology* 1 1987;128:11–45.
19. Kauffman, S and Weinberger, E. The NK model of rugged fitness landscapes and its application to maturation of the immune response. *Journal of Theoretical Biology* 2 1989;141:211–245.
20. Orlin, J, Punnen, A, and Schulz, A. Approximate local search in combinatorial optimization. *SIAM J. Comput.* 5 2004;33:1201–1214.
21. Gillespie, JH. *Population genetics: a concise guide.* John Hopkins University Press, 2010.

22. Couce, A and Tenaillon, OA. The rule of declining adaptability in microbial evolution experiments. *Frontiers in genetics* 2015;6:99.
23. Wisser, MJ, Ribeck, N, and Lenski, RE. Long-term dynamics of adaptation in asexual populations. *Science* 2013;342:1364–1367.
24. Lenski, RE, Wisser, MJ, Ribeck, N, et al. Sustained fitness gains and variability in fitness trajectories in the long-term evolution experiment with *Escherichia coli*. *Proc. R. Soc. B* 2015;282:20152292.
25. Boltzmann, L. Entgegnung auf die wärmetheoretischen Betrachtungen des Hrn. E. Zermelo. *Annalen der physik* 1896;293:773–784.
26. Barton, N, Partridge, L, et al. Limits to natural selection. *BioEssays* 2000;22:1075–1084.
27. Johnson, D, Papadimitriou, C, and Yannakakis, M. How easy is local search? *Journal of Computer and System Sciences* 1 1988;37:79–100.
28. Roughgarden, T. Computing equilibria: A computational complexity perspective. *Economic Theory* 1 2010;42:193–236.
29. Baldwin, JM. A new factor in evolution. *The american naturalist* 1896;30:441–451.
30. Simpson, GG. The Baldwin effect. *Evolution* 1953;7:110–117.
31. Hammarlund, SP, Connelly, BD, Dickinson, KJ, and Kerr, B. The evolution of cooperation by the Hankshaw effect. *Evolution* 2016;70:1376–1385.
32. Orzack, SH and Sober, E. *Adaptationism and optimality*. Cambridge University Press, 2001.
33. Chapdelaine, P and Creignou, N. The complexity of Boolean constraint satisfaction local search problems. *Annals of Mathematics and Artificial Intelligence* 2005;43:51–63.
34. Levinthal, DA. Adaptation on rugged landscapes. *Management science* 1997;43:934–950.
35. Rivkin, JW and Siggelkow, N. Patterned interactions in complex systems: Implications for exploration. *Management Science* 2007;53:1068–1085.
36. Kaznatcheev, A. Complexity of evolutionary equilibria in static fitness landscapes. arXiv preprint:1308.5094 2013.
37. de Visser, J, Park, S, and Krug, J. Exploring the effect of sex on empirical fitness landscapes. *The American Naturalist* 2009.
38. Franke, J, Klozer, A, de Visser, J, and Krug, J. Evolutionary accessibility of mutation pathways. *PLoS Comp. Biol.* 8 2011;7:e1002134.
39. Goulart, C, Mentar, M, Crona, K, et al. Designing antibiotic cycling strategies by determining and understanding local adaptive landscapes. *PLoS One* 2 2013;8:e56040.
40. Visser, JAG de and Lenski, RE. Long-term experimental evolution in *Escherichia coli*. XI. Rejection of non-transitive interactions as cause of declining rate of adaptation. *BMC Evolutionary Biology* 2002;2:19.
41. Poelwijk, F, Kiviet, D, Weinreich, D, and Tans, S. Empirical fitness landscapes reveal accessible evolutionary paths. *Nature* 2007;445:383–386.
42. Horn, J, Goldberg, DE, and Deb, K. Long path problems. In: *International Conference on Parallel Problem Solving from Nature*. Springer. 1994:149–158.
43. Kauffman, S. *The origins of order: Self organization and selection in evolution*. Oxford University Press, 1993.
44. Weinberger, E. NP completeness of Kauffman’s N-k model, a tunably rugged fitness landscape. Santa Fe Institute working paper 1996:1996–02–003.
45. Wright, A, Thompson, R, and Zhang, J. The computational complexity of N-K fitness functions. *Evolutionary Computation, IEEE Transactions on* 4 2000;4:373–379.
46. Schaffer, A and Yannakakis, M. Simple local search problems that are hard to solve. *SIAM Journal on Computing* 1991;20:56–87.
47. Tovey, CA. Low order polynomial bounds on the expected performance of local improvement algorithms. *Mathematical Programming* 1986;35:193–224.
48. Kryazhimskiy, S, Tkacik, G, and Plotkin, J. The dynamics of adaptation on correlated fitness landscapes. *Proc. Natl. Acad. Sci. USA* 44 2009;106:18638–18643.
49. Li, M and Vitányi, PM. Average case complexity under the universal distribution equals worst-case complexity. *Information Processing Letters* 1992;42:145–149.
